# Supplementary material
Source: publisher figshare collection journal article supplement (https://gsajournals.figshare.com/ndownloader/files/21944589)
Supplement: Supplementary file 1 [file 21944589]

Table S1: NCBI SRA accession and Voucher information of genome raw sequence data.

| Species | NCBI SRA Accession numbers | Voucher Information |
| --- | --- | --- |
| *Zea mays* | SRS291653 | - |
| *Zea luxurians* | SRR088692 | - |
| *Zea diploperennis* | XXXXXXXX * | - |
| *Tripsacum dactyloides* | SRS302460 | - |
| *Tripsacum australe* | - | Kellogg MIA 34499 |
| *Tripsacum laxum* | - | Kellogg MIA 34792 |
| *Sorghum bicolor* | SRR5271056 | - |
| *Urelytrum digitatum* | SM3109 | - |

Note: * - awaiting for an ID number from the short read archive
